# Supplementary material
Source: PubMed Central journal article supplement (PMC4210176)

## SUPPORTING INFORMATION

# Analysis of factors influencing hydration site prediction based on molecular dynamics simulations

*Ying Yang, Bingjie Hu, and Markus A. Lill\**

Department of Medicinal Chemistry and Molecular Pharmacology, College of Pharmacy, Purdue  
University, 575 Stadium Mall Drive, West Lafayette, Indiana 47906, United States

\*To whom correspondence may be addressed.

E-mail: [mlill@purdue.edu](mailto:mlill@purdue.edu)

Phone: (765) 496-9375

Fax: 765 494-1414.

**Figure S1. Correlation of energy values of the paired hydration sites between those obtained from the 20ns MD simulations and those obtained from shorter simulation lengths (1.5 ns, 2 ns, 3 ns, 5 ns, 10 ns)**

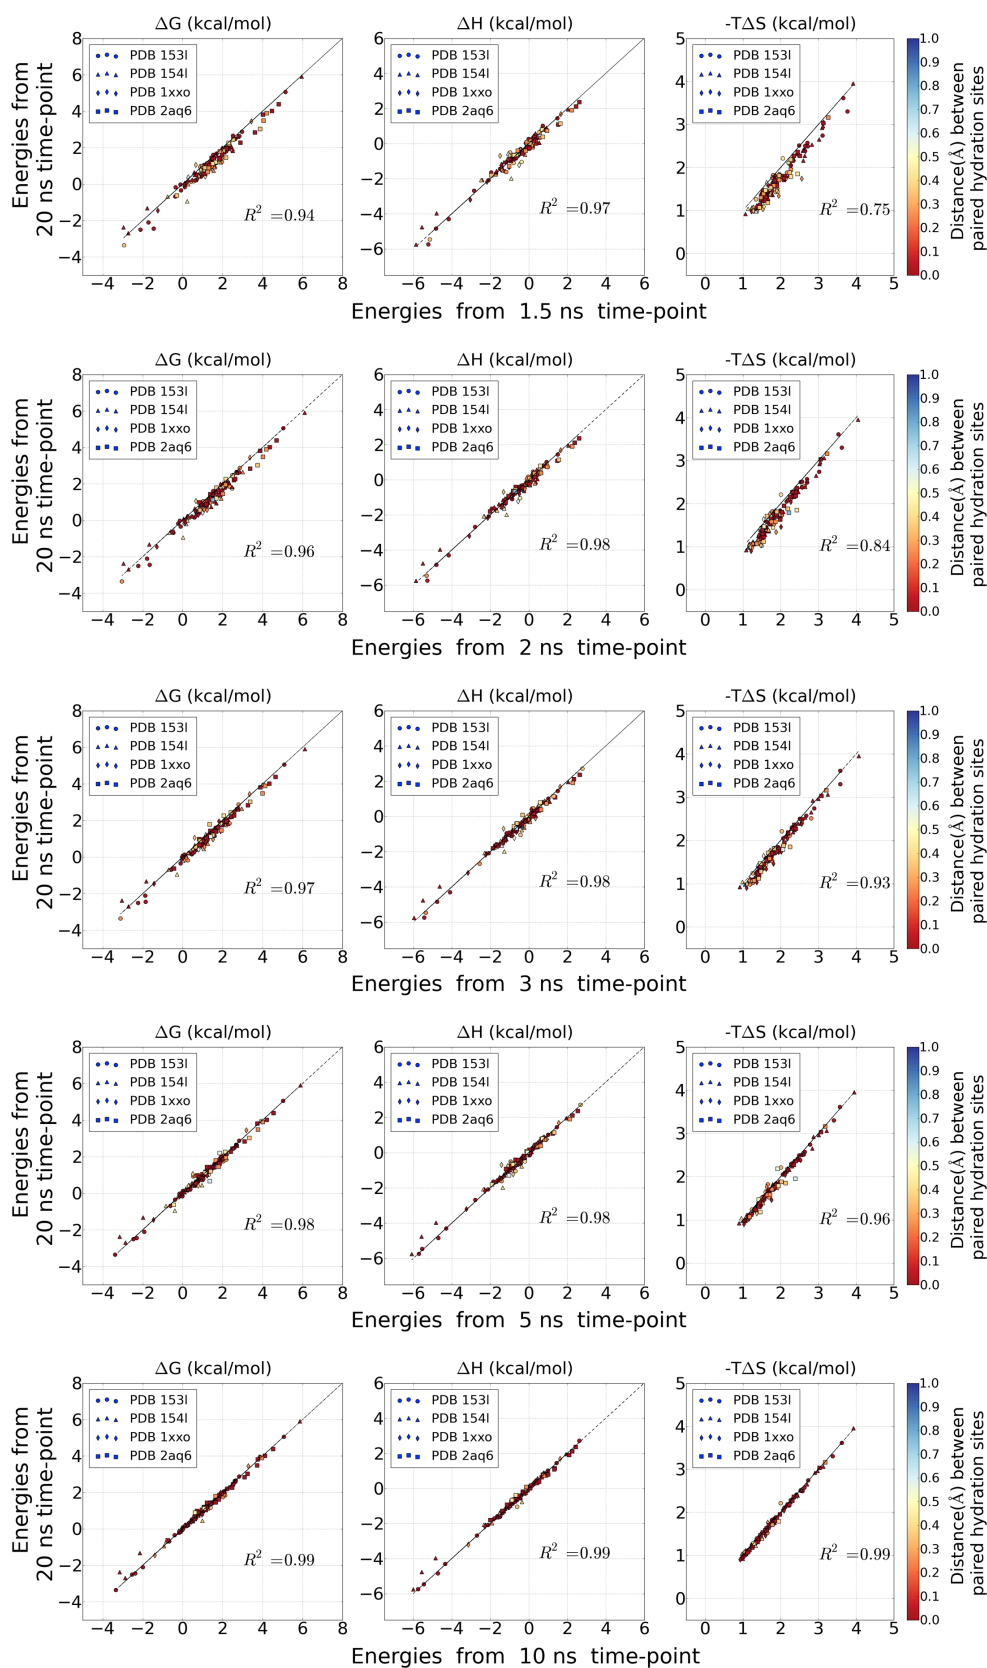

**Figure S2. Superimposition of hydration sites in the binding site of pyridoxine 5'-phosphate oxidase. (PDB: 1XXO)**

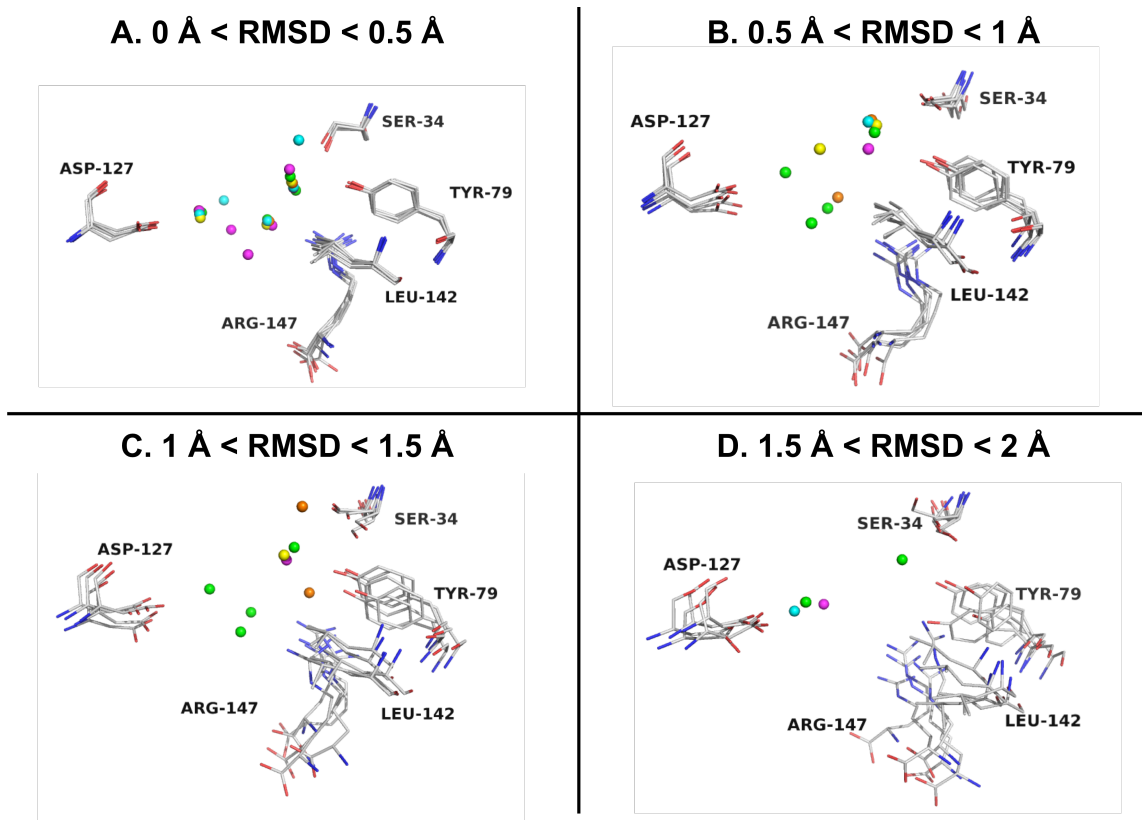

**Figure S3. Superimposition of hydration sites in the binding site of goose egg-white lysozyme. (PDB: 153L)**

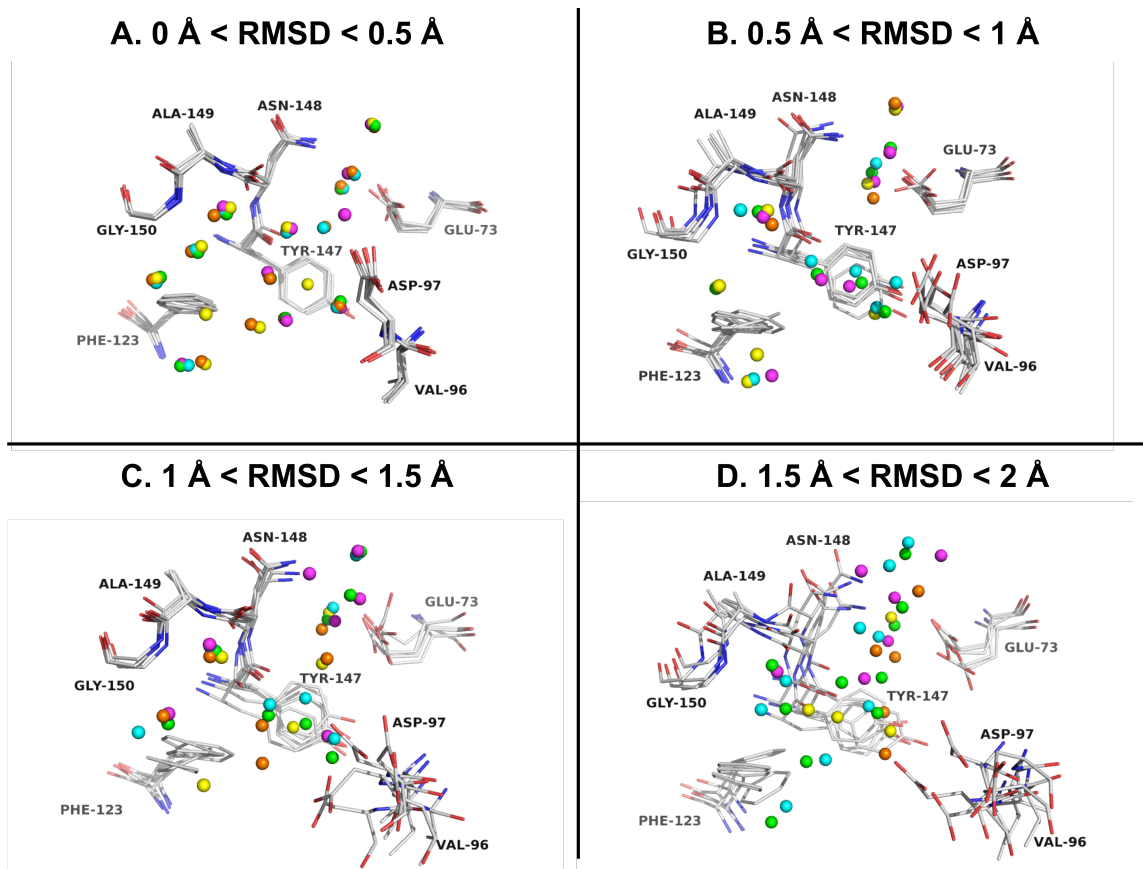

Figure S4. Superimposition of hydration sites in the binding site of goose lysozyme. (PDB: 154L)

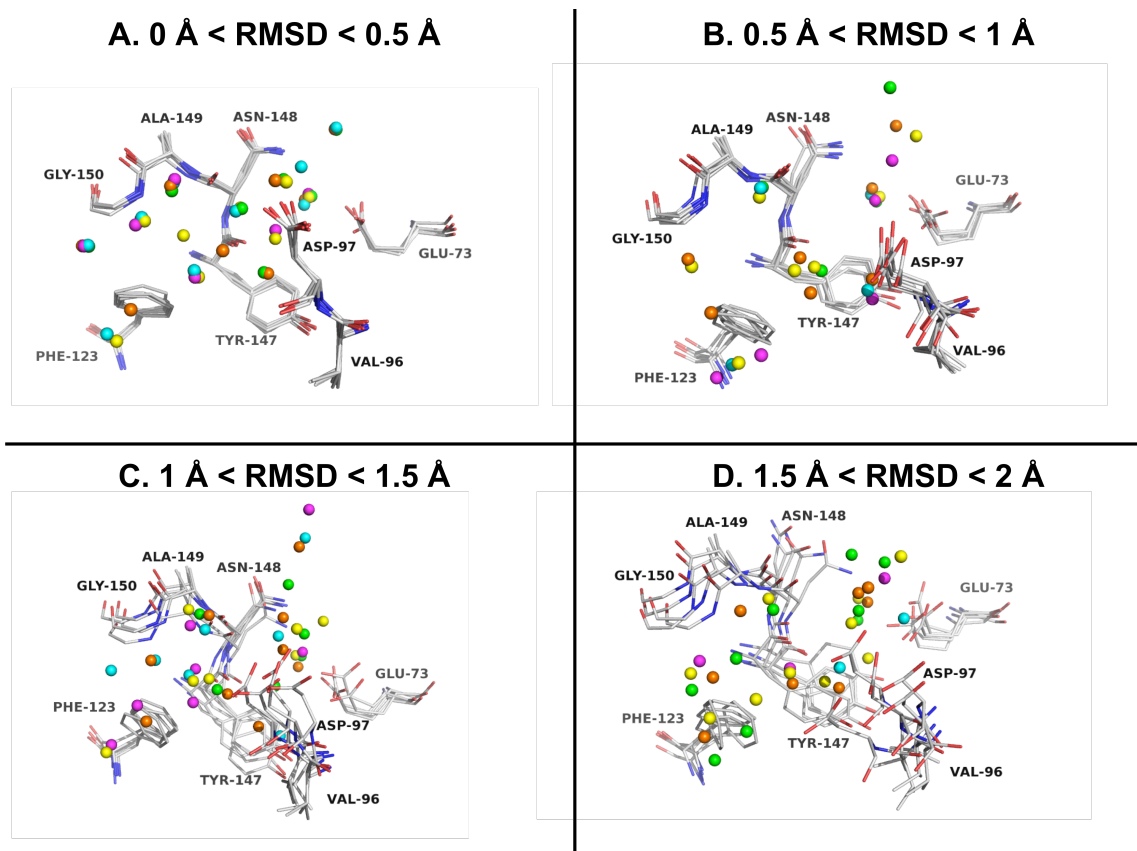

**Figure S5. Pairwise comparison between two different simulations of Goose lysozyme apo structure (PDB: 153L)**

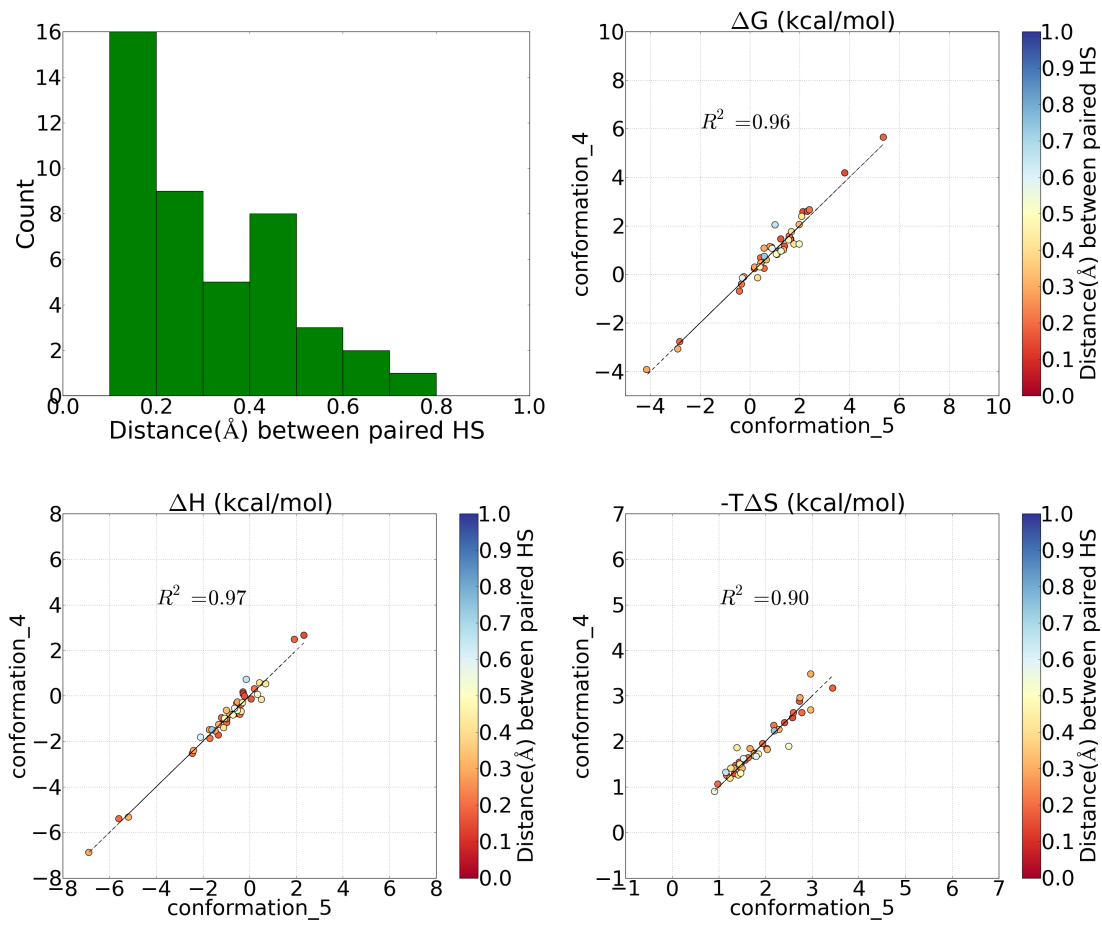

**Figure S6. Pairwise comparison between two different simulations of pyridoxine 5'-phosphate oxidase (PDB: 1XXO)**

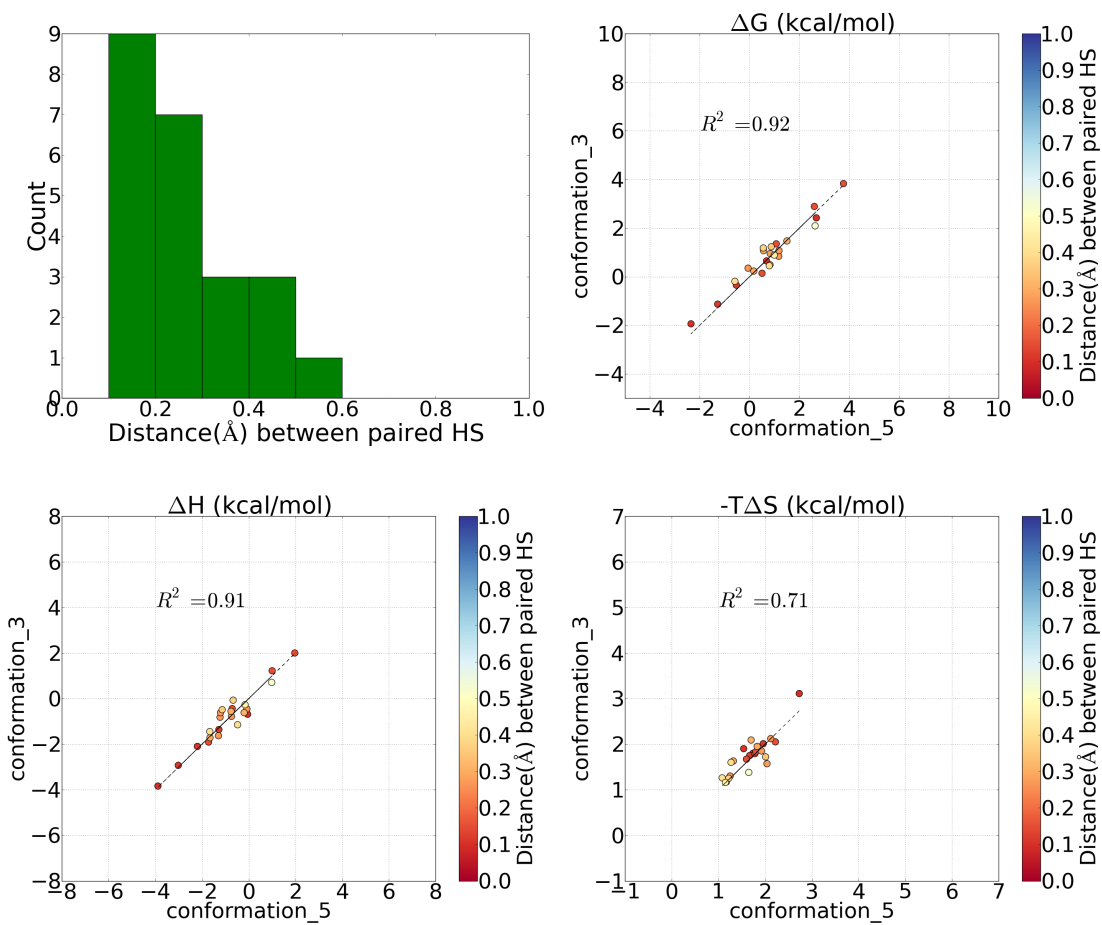

**Figure S7. Pairwise comparison between two different simulations of pyridoxine 5'-phosphate oxidase (PDB: 2AQ6)**

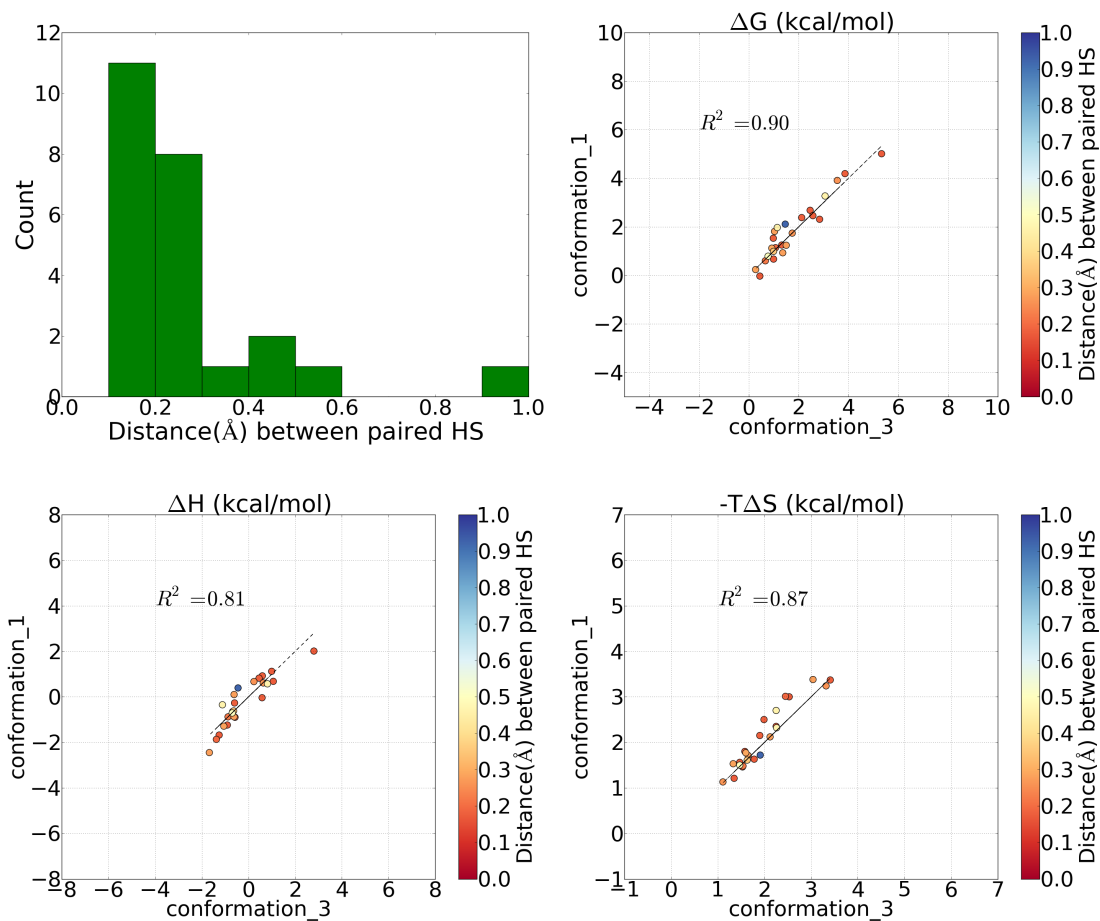

Supplement: ci500426q_si_001.pdf [file ci500426q_si_001.pdf]
